# Supplementary material
Source: PubMed Central journal article supplement (PMC3071385)

**Appendix 1 (as supplied by the authors): Number of patients newly started on an angiotensin-converting enzyme inhibitor (ACEi), an angiotensin receptor blocker (ARB) or both during the course of this study**

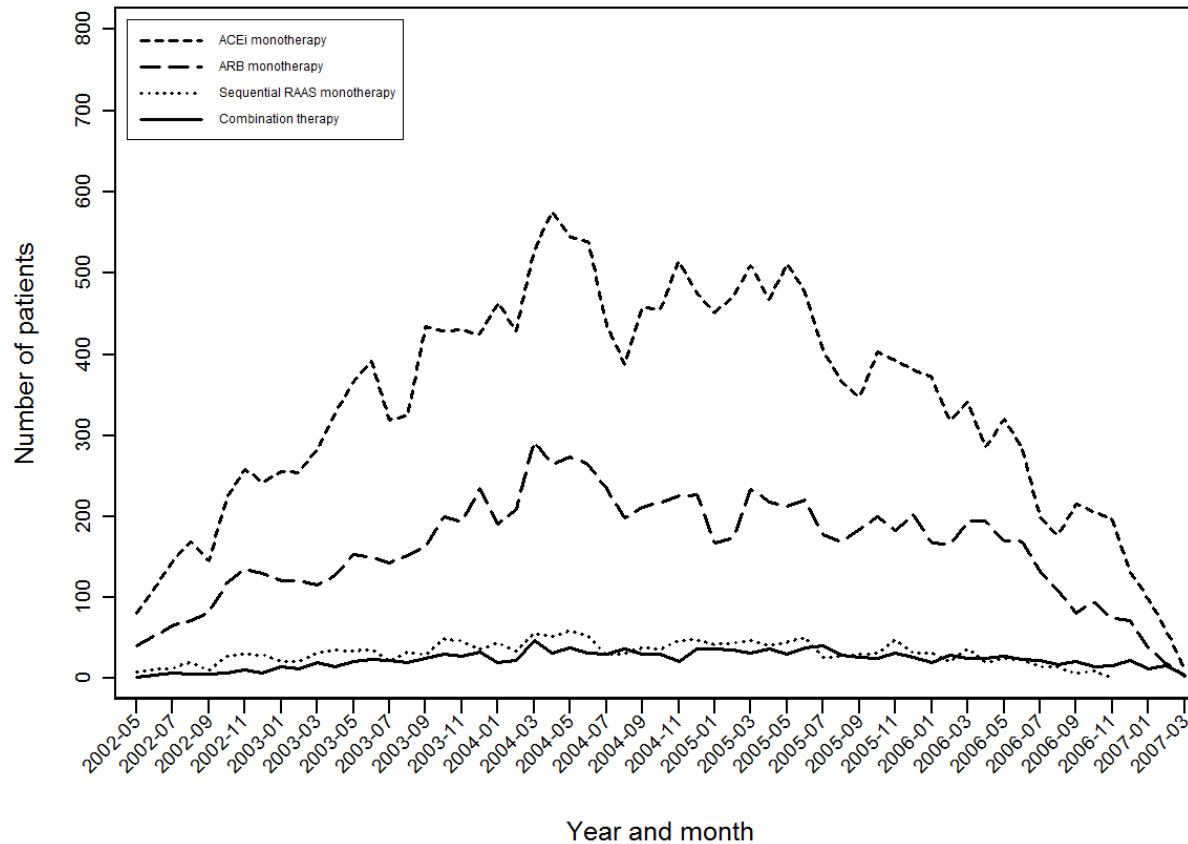

Supplement: 101333_1.pdf [file 101333_1.pdf]
