# Supplementary material
Source: PubMed Central journal article supplement (PMC3071385)

**Appendix 2 (as supplied by the authors): Length of time before therapy changed in patients prescribed an angiotensin-converting enzyme inhibitor (ACEi), an angiotensin receptor blocker (ARB) or both. RAAS = renin-angiotensin-aldosterone system.**

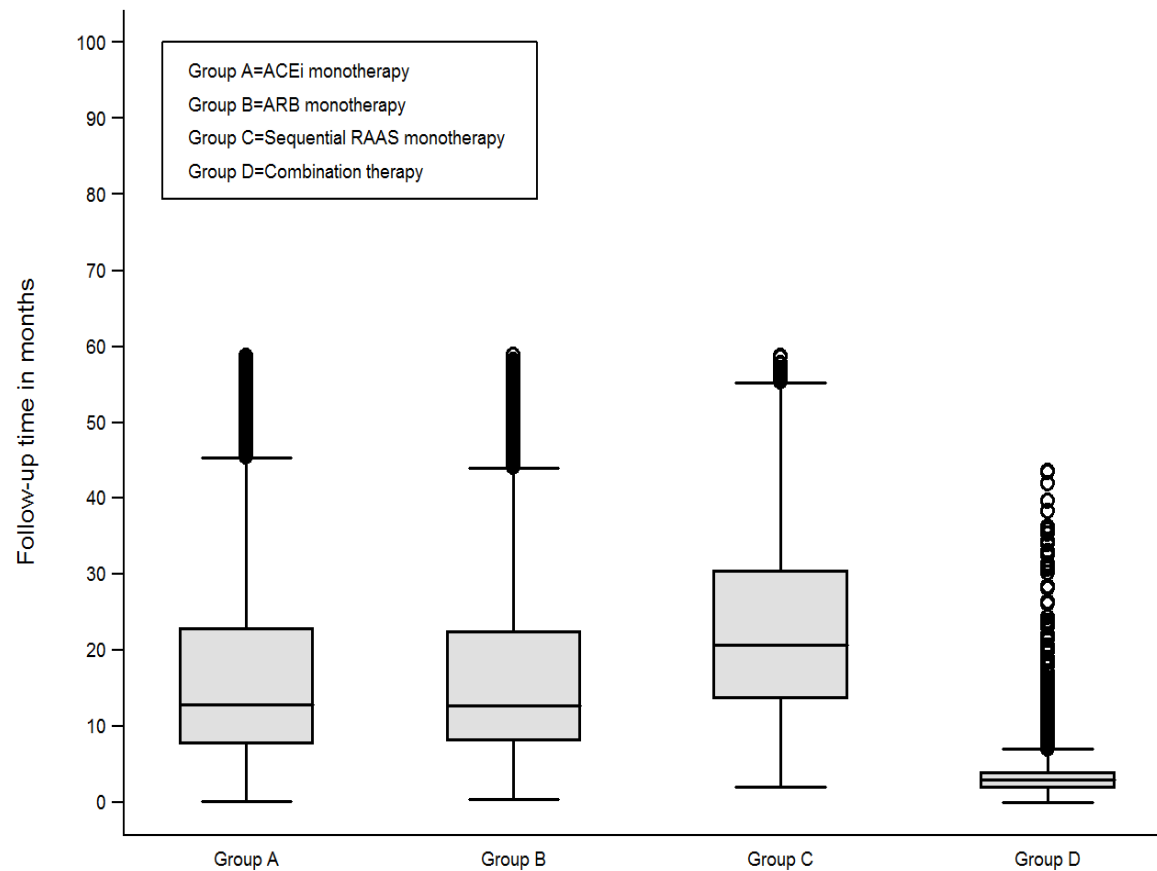

Supplement: 101333_2.pdf [file 101333_2.pdf]
