# Supplementary material
Source: PubMed Central journal article supplement (PMC3071385)

**Appendix 3 (as supplied by the authors): Distribution of change in estimated glomerular filtration rate (eGFR) from baseline in those who stopped combination therapy**

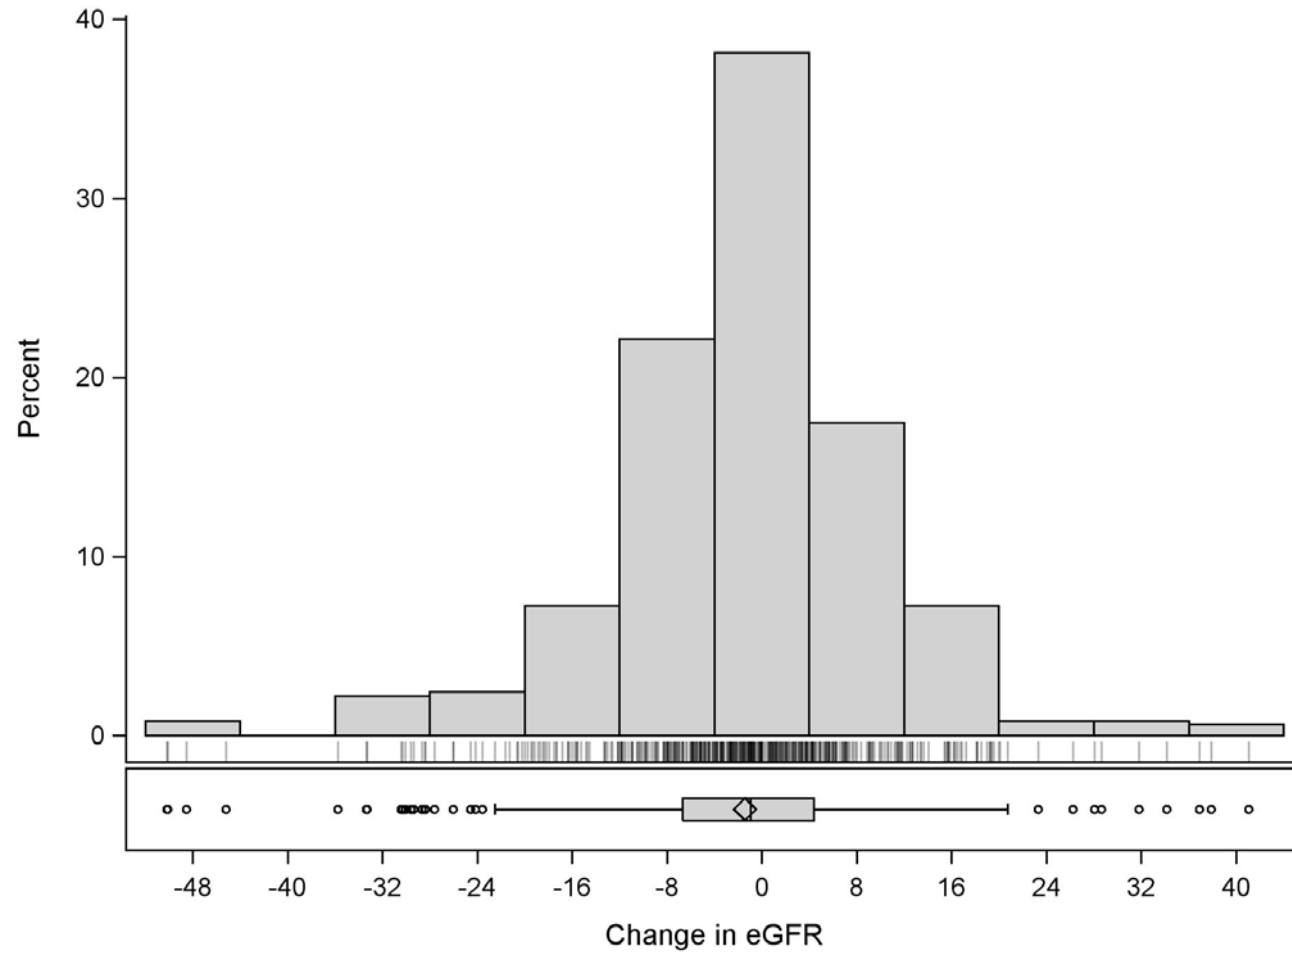

Supplement: 101333_3.pdf [file 101333_3.pdf]
